# Supplementary material
Source: MDPI journal article supplement (https://www.mdpi.com/2073-4441/14/17/2708)
Supplement: s1 [file s1]

# **Using Electrochemical Oxidation to Remove PFAS in Simulated Investigation-Derived Waste (IDW): Laboratory and Pilot-Scale experiments**

Amy Yanagida<sup>a</sup>, Elise Webb<sup>b</sup>, Clifford E. Harris<sup>c</sup>, Mark Christenson<sup>b</sup>, and Steve  
Comfort<sup>a,\*</sup>

---

## **Supplementary Material (SM)**

1 Figure

---

<sup>a</sup> *School of Natural Resources, University of Nebraska, Lincoln, NE 68583-0915, USA;  
scomfort@unl.edu.*

<sup>b</sup> *AirLift Environmental, LLC, 5900 N. 58<sup>th</sup>, Suite 5, Lincoln, NE 68507, USA*

<sup>c</sup> *Department of Chemistry, Albion College, MI 49224*

---

\* Corresponding author: Email Address: S. Comfort; [scomfort@unl.edu](mailto:scomfort@unl.edu)

## **2. Materials and methods**

### ***2.2 Chemical analysis***

Preliminary batch experiments were conducted using  $\mu\text{g L}^{-1}$  (ppb) concentrations of PFOS and PFOA and analyzing samples with a Quattro Micro LC-MS/MS (Waters Corp) using a negative mode electrospray ionization. All fluoroethylene polymer tubing was replaced with PEEK tubing and a Restek PFAS delay phase column (50x2.1mm) was installed between the pump mixer and the C-18 column (250x2.1mm). Mobile phases are water with 20 mM ammonium acetate and methanol.

### 3. Results

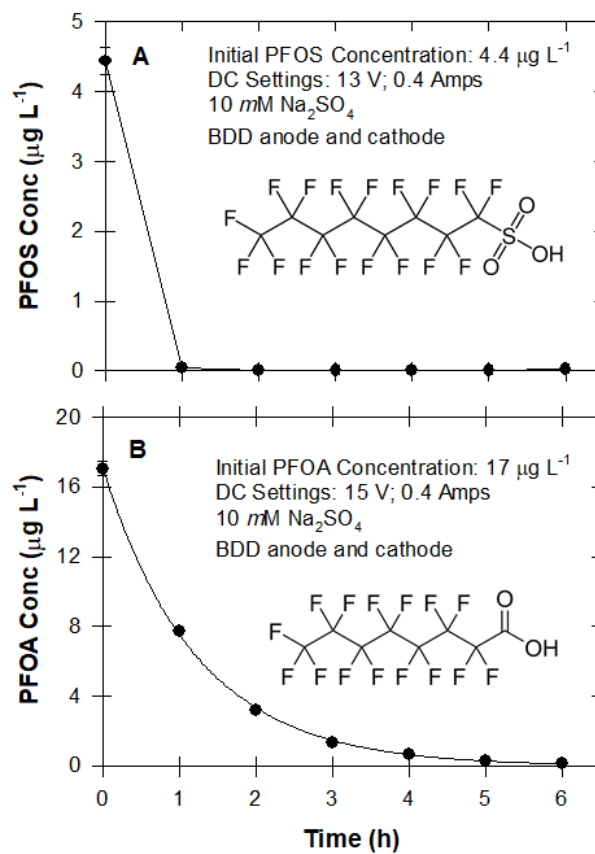

**Figure S1.** Temporal changes in PFOS and PFOA concentrations following treatment with EC-BDD.
